# Supplementary material for: A Decade Long Slowdown in Road Accidents and Inherent Consequences Predicted for South Africa
Source: Preprints.org preprint supplement (doi:10.20944/preprints202103.0713.v1), 2021-03-29
Supplement: Supplementary file 1 [file Table S2.doc]

**Table S2.** Comparison of R2 values in SEM with non-collinear versus SEM with collinear variables.

| Response Variables in the SEM | R2 in SEM without collinear variables | R2 in SEM with collinear variables |
| --- | --- | --- |
| crashes | 0.99 | 1.00 |
| Casualities | 0.83 | 1.00 |
| Fatal crashes | 0.94 | 1.00 |
| persons_killed | 0.90 | 0.99 |
| nber_vehicles | 0.04 | 0.04 |
| regist_vehicles | 0.99 | 0.99 |
| unregist_vehicles | 0.97 | 0.99 |
| driver_licence | 0.53 | 0.99 |
| dist_travelled | 0.85 | 0.94 |
