# Supplementary figures and images for: A Decade Long Slowdown in Road Accidents and Inherent Consequences Predicted for South Africa
Source: Preprints.org preprint supplement (doi:10.20944/preprints202103.0713.v1), 2021-03-29

Missingness Map

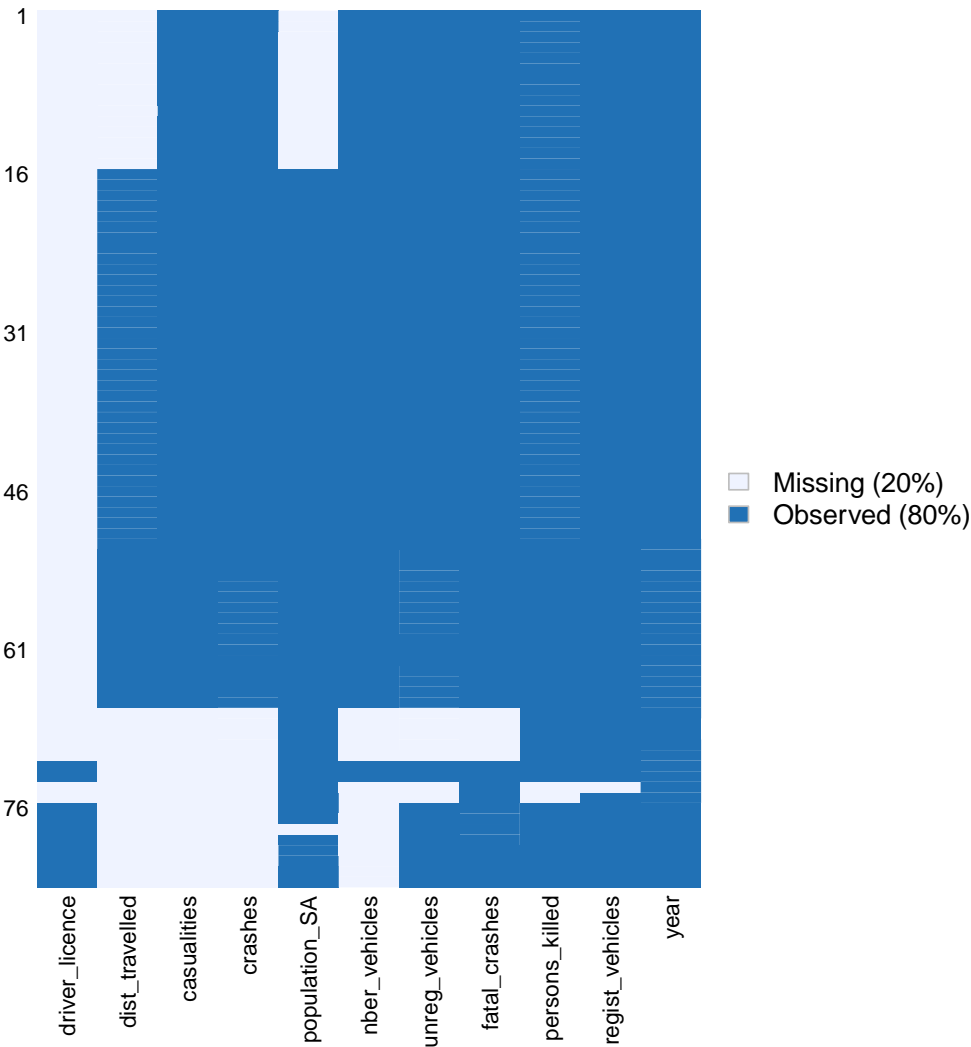

Supplement: Supplementary file 1 [file supplementary]
